# Supplementary material for: Cementless Distal Fixation Modular Stem Hemiarthroplasty without Calcar Replacement in Geriatric Unstable Intertrochanteric Femur Fractures
Source: Research Square preprint supplement (doi:10.21203/rs.3.rs-8388601/v1), 2026-01-19
Supplement: Supplementary file 1 [file 9127f49bddf95296197117c5.docx]

**Table 1**: Descriptive characteristics of patients

| **Demographic variables** | **Data** |
| --- | --- |
| **Age** (*year*) | 82.7±6.6 (75-97) |
| **Sex,** *n* (%) |  |
| Male | 17 (35.4) |
| Female | 31 (64.6) |
| **BMI**, (*kg*/*m*2) | 24.59±4.42 (19.1-29.9) |
| **ASA score,** *n* (%) |  |
| 1 | 1 (2.1) |
| 2 | 18 (37.5) |
| 3 | 28 (58.3) |
| 4 | 1 (2.1) |
| **Singh index,** *n* (%) |  |
| 1 | 5 (10.4) |
| 2 | 9 (18.8) |
| 3 | 14 (29.2) |
| 4 | 20 (41.7) |
| **Dorr type**, *n* (%) |  |
| B | 26 (54.2) |
| C | 22 (45.8) |
| **AO fracture type**, *n* (%) |  |
| A2.2 | 22 (45.8) |
| A2.3 | 26 (54.2) |

n: Number of patients, %: Percentage value, BMI: Body mass index, ASA: The american society of anesthesiologists

AO: Arbeitsgemeinschaft für osteosynthesefragen (association of the study of internal fixation)

Age and BMI are summarized as mean ± standard deviation (minimum-maximum) value.

**Table 2:** Clinical characteristics of the patients

| **Demographic variables** | **Data** |
| --- | --- |
| **Total length of stay** (days) | 7.8±1.5 (5-11) |
| **Time from trauma to surgery** (days) | 3.7±1.0 (2-5) |
| **Time from surgery to discharge** (days) | 4.1±1.2 |
| **Follow-up duration** (days) | 32 (13-60) |
| **Stem subsidence** *n* (%) |  |
| Absent | 16 (33.3) |
| Present | 32 (66.7) |
| **Stem subsidence** (*mm*) *n*=32 | 4.2 (1.1-17.3) |
| **CFR** | 0.83±0.12 (0.60-1.00) |
| **VAS** | 5 (0-9) |
| **Pre-operative CAS** | 6 (4-6) |
| **Post-operative CAS** | 4 (3-6) |
| **Pre-operative HHS** | 78 (53-100) |
| **Post-operative HHS** | 66 (18-100) |
| **Gluteal mechanism repair**, *n* (%) |  |
| Cerclage wire  Non-absorbable suture | 14 (29.2)  34 (70.8) |
| **Radiolucent line**, *n* (%)  Present  Absent | 8 (16.7)  40 (83.3) |
| **Formation of bone bridge**, *n* (%)  Present  Absent | 34 (70.8)  14 (29.2) |

*n*: Number of patients, %: Percentage value, mm: milimeter, CFR: Canal fill ratio, VAS: Visual analog scale, CAS: Cumulative ambulatory score HHS: Harris hip score.

Numerical variables were summarized as mean ± standard deviation (minimum-maximum) or as median (minimum-maximum) values.

**Table 3:** Comparisons based on femoral stem subsidence

|  | **Stem subsidence** | | **Test Statistics** | |
| --- | --- | --- | --- | --- |
|  | ≤3  *n*=31 | >3  *n*=17 | Test  value | p  value |
| **Age**, (*year*) | 83.4±6.6 | 81.2±6.6 | 1.098 | 0.278† |
| **Sex**, *n* (%) |  |  |  |  |
| Male | 12 (38.7) | 5 (29.4) | 0.108 | 0.742 Փ |
| Female | 19 (61.3) | 12 (70.6) |  |  |
| **BMI**, *n* (%) |  |  | 0.335 | 0.846‡ |
| 19-22.9 | 12 (38.7) | 8 (47.1) |
| 23-27.49 | 10 (32.3) | 5 (29.4) |
| ≥27.5 | 9 (29.0) | 4 (23.5) |
| **ASA score**, *n* (%) |  |  |  |  |
| 1 | 1 (3.2) | 0 (0.0) |  |  |
| 2 | 10 (32.3) | 8 (47.1) | 3.442 | 0.334¥ |
| 3 | 20 (64.5) | 8 (47.1) |  |  |
| 4 | 0 (0.0) | 1 (5.8) |  |  |
| **Singh** **index**, *n* (%) |  |  |  |  |
| 1 | 5 (16.1) | 0 (0.0) |  |  |
| 2 | 7 (22.6) | 2 (11.8) | 4.250 | 0.239¥ |
| 3 | 8 (25.8) | 6 (35.3) |  |  |
| 4 | 11 (35.5) | 9 (52.9) |  |  |
| **Dorr type**, *n* (%) |  |  |  |  |
| B | 16 (51.6) | 10 (58.8) | 0.031 | 0.860Փ |
| C | 15 (48.4) | 7 (41.2) |  |  |
| **AO fracture type**, *n* (%) |  |  |  |  |
| A2.2 | 12 (38.7) | 10 (58.8) | 1.071 | 0.301Փ |
| A2.3 | 19 (61.3) | 7 (41.2) |  |  |
| **CFR** | 0.887±0.102 | 0.741±0.112 | 4.565 | **<0.001**† |
| **VAS** | 3 (0-7) | 7 (0-9) | 3.897 | **<0.001**& |
| **Pre-operative CAS** | 6 (4-6) | 6 (4-6) | 1.066 | 0.286& |
| **Post-operative CAS** | 5 (3-6) | 4 (3-6) | 2.373 | **0.018**& |
| **Pre-operative HHS** | 77 (53-100) | 85 (64-100) | 1.200 | 0.230& |
| **Post-operative HHS** | 64 (24-100) | 66 (18-98) | 0.442 | 0.658& |
| **Gluteal mechanism repair**, *n* (%)  Non-absorbable suture 21 (67.7) 13 (76.5) - 0.741 ŧ  Cerclage wire 10 (32.3) 4 (23.5) | | | | |
| **Radiolucent line**, *n* (%)  Present 0 (0.0) 8 (47.1) - **<0.001** ŧ  Absent 31 (100.0) 9 (52.9) | | | | |
| **Formation of bone bridge**, *n* (%)  Present 28 (90.3) 6 (35.3) - **<0.001** ŧ  Absent 3 (9.7) 11 (64.7) | | | | |

*n*: Number of patients, %: Column percentage value, BMI: Body Mass Index, ASA: The american society of anesthesiologists, AO: Arbeitsgemeinschaft für Osteosynthesefragen (association of the study of ınternal fixation), CFR: Canal fill ratio, VAS: Visual analog scale, CAS: Cumulative ambulatory score, HHS: Harris hip score

Numerical variables were summarized as mean ± standard deviation or as median (minimum-maximum) values. †: Independent Samples t-test, &: Mann-Whitney U test, ‡: Pearson chi-square Test, ¥: Fisher-Freeman-Halton exact test, Փ: Yates chi-square test, ŧ: Fisher exact test
